# Supplementary material
Source: publisher figshare collection journal article supplement (https://acs.figshare.com/ndownloader/files/11274194)
Supplement: Supplementary file 1 [file 11274194]

## Supplementary Information

### **Miktoarm Amphiphilic Block Copolymer with Singlet Oxygen-Labile Stereospecific $\beta$ -Aminoacrylate Junction: Synthesis, Self-assembly, and Photodynamically Triggered Drug Release**

*Gurusamy Saravanakumar<sup>1</sup>, Hyeongmok Park<sup>1</sup>, Jinhwan Kim<sup>2</sup>, Dongsik Park<sup>1</sup>, Swapan  
Pramanick<sup>1</sup>, Dae Heon Kim<sup>3,\*</sup> and Won Jong Kim<sup>1,\*</sup>*

<sup>1</sup>Department of Chemistry, Pohang University of Science and Technology (POSTECH), Pohang  
37673, Republic of Korea.

<sup>2</sup>Center for Self-assembly and Complexity, Institute for Basic Science (IBS), Pohang, 37673,  
Republic of Korea.

<sup>3</sup>Department of Biology, Sunchon National University, Suncheon 57922, Republic of Korea.

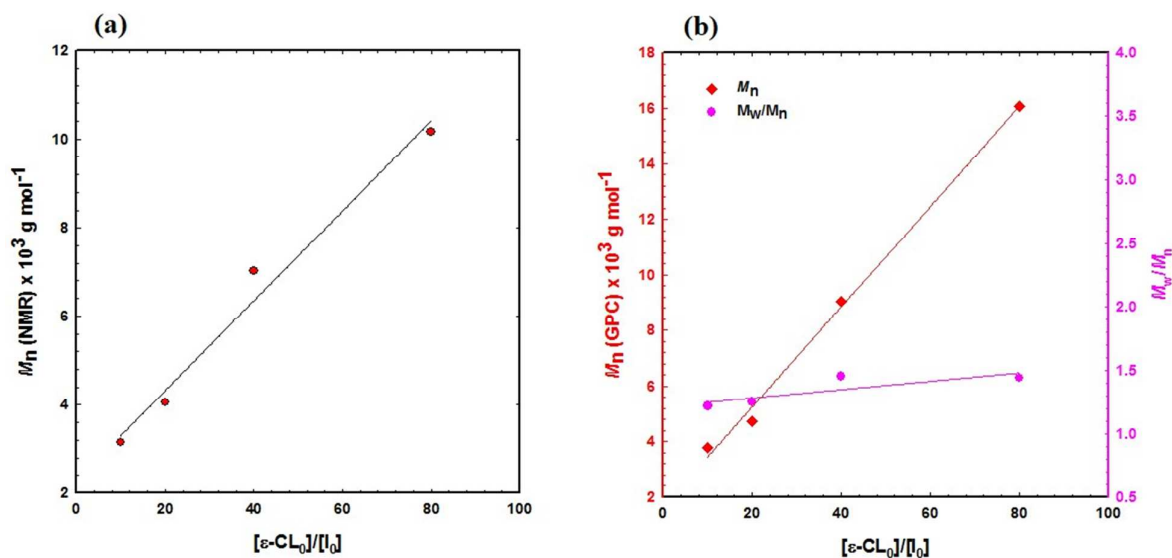

**Figure S1.** (a) The plot of feed  $[M_0]/[I_0]$  versus  $M_n$  using  $^1\text{H-NMR}$  and (b)  $[M_0]/[I_0]$  versus  $M_n$  and  $M_w/M_n$  using GPC. The observed difference in molecular weights determined by  $^1\text{H-NMR}$  and GPC is due to the use of polystyrene standards for calibration in the analysis of the GPC method.

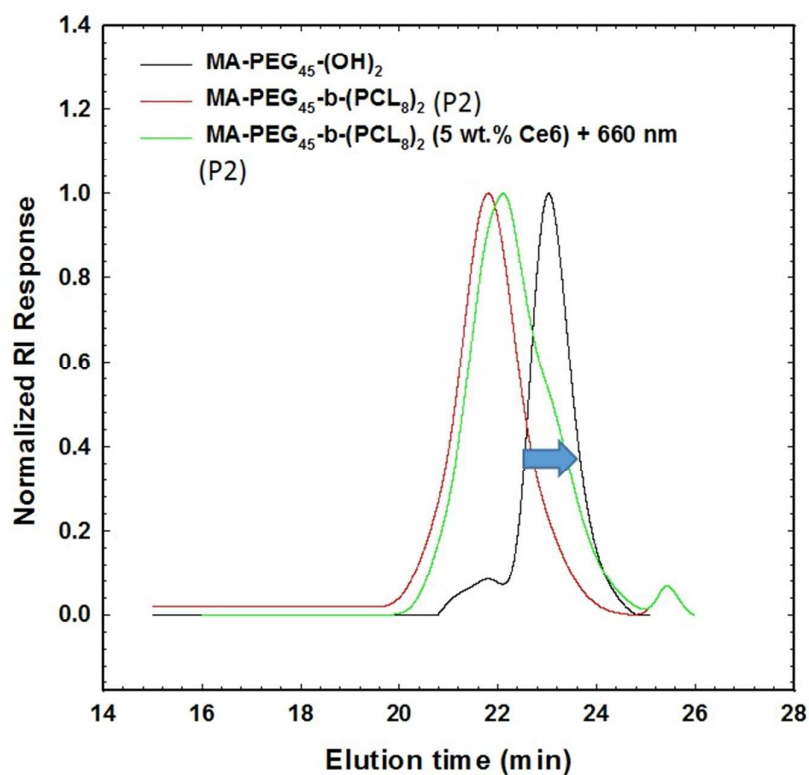

**Figure S2.** GPC trace of MA-PEG<sub>45</sub>-b-(PCL<sub>8</sub>)<sub>2</sub> (P2) before and after 660 nm laser irradiation for 30 min.

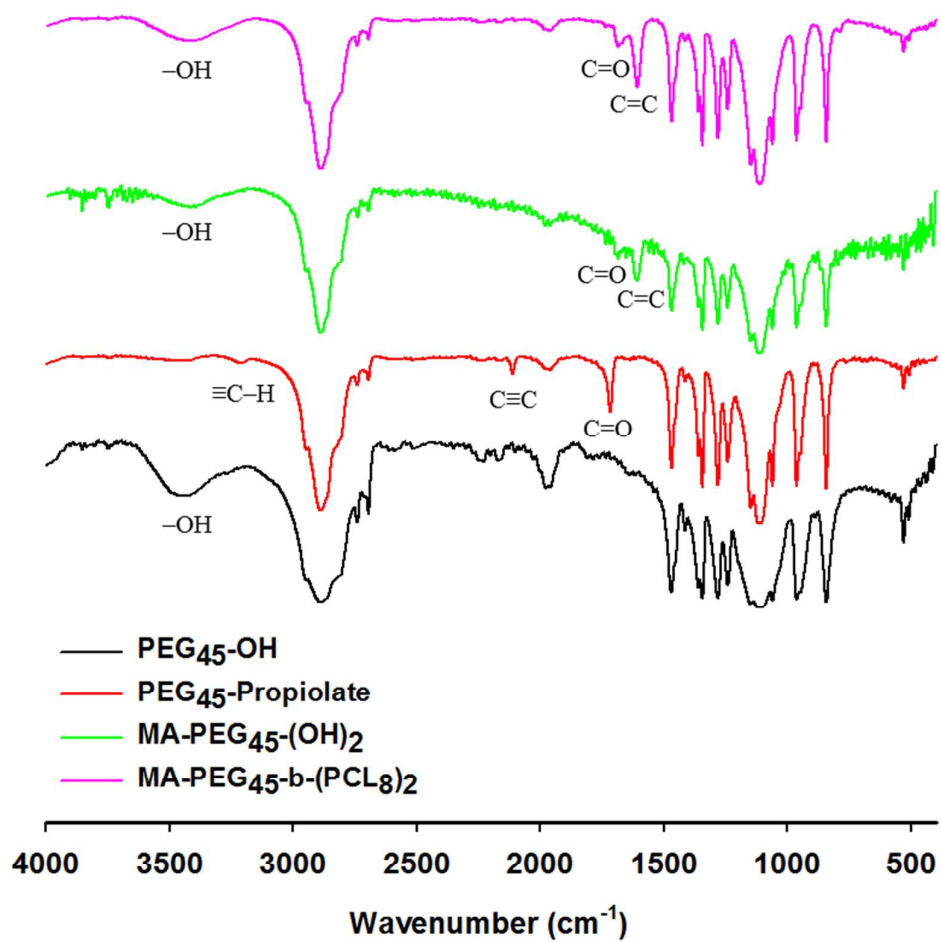

**Figure S3.** FT-IR spectra of PEG<sub>45</sub>-OH, PEG<sub>45</sub>-propiolate, MA-PEG<sub>45</sub>-(OH)<sub>2</sub>, MA-PEG<sub>45</sub>-b-(PCL<sub>8</sub>)<sub>2</sub>

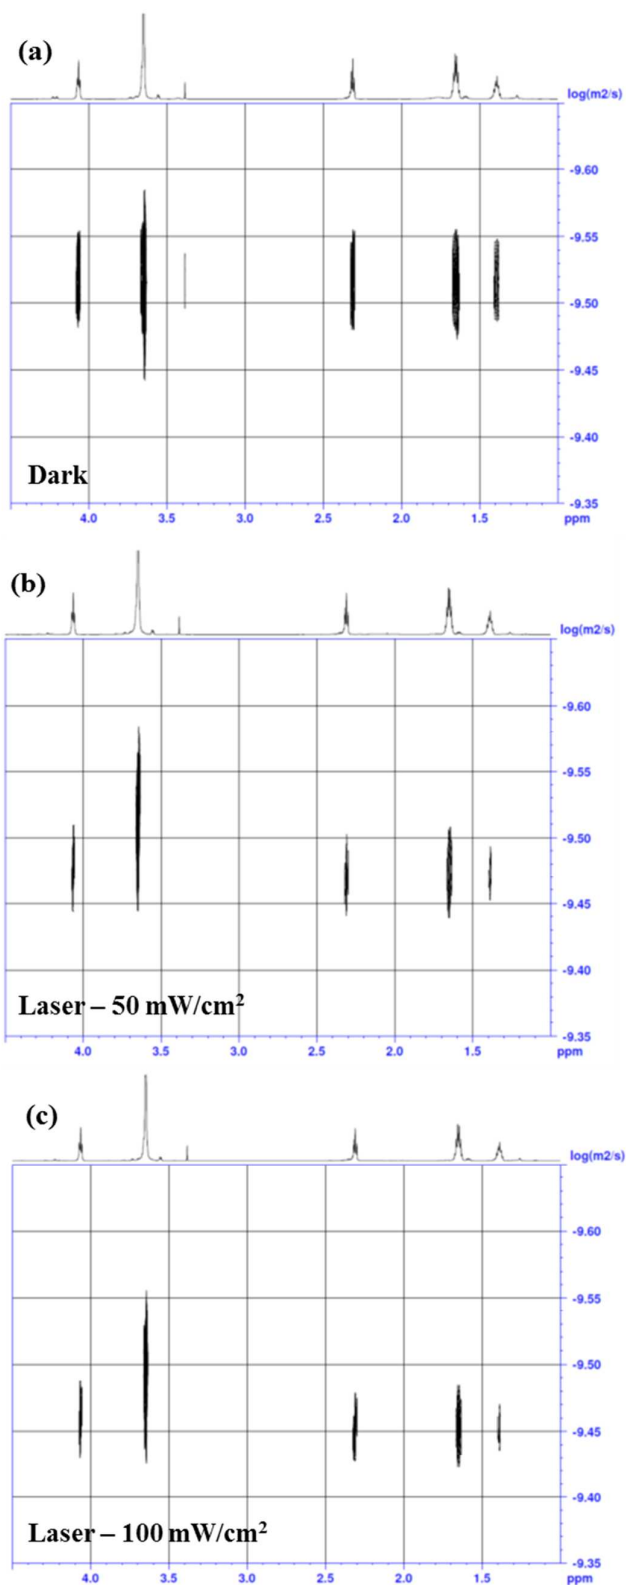

**Figure S4. DOSY NMR of P2 with Ce6 (~5 wt%) in the (a) dark, and after exposing laser irradiation of power density (b) 50 mW/cm<sup>2</sup> and (c) 100 mW/cm<sup>2</sup> for 30 min, where the solvent is CDCl<sub>3</sub>.**

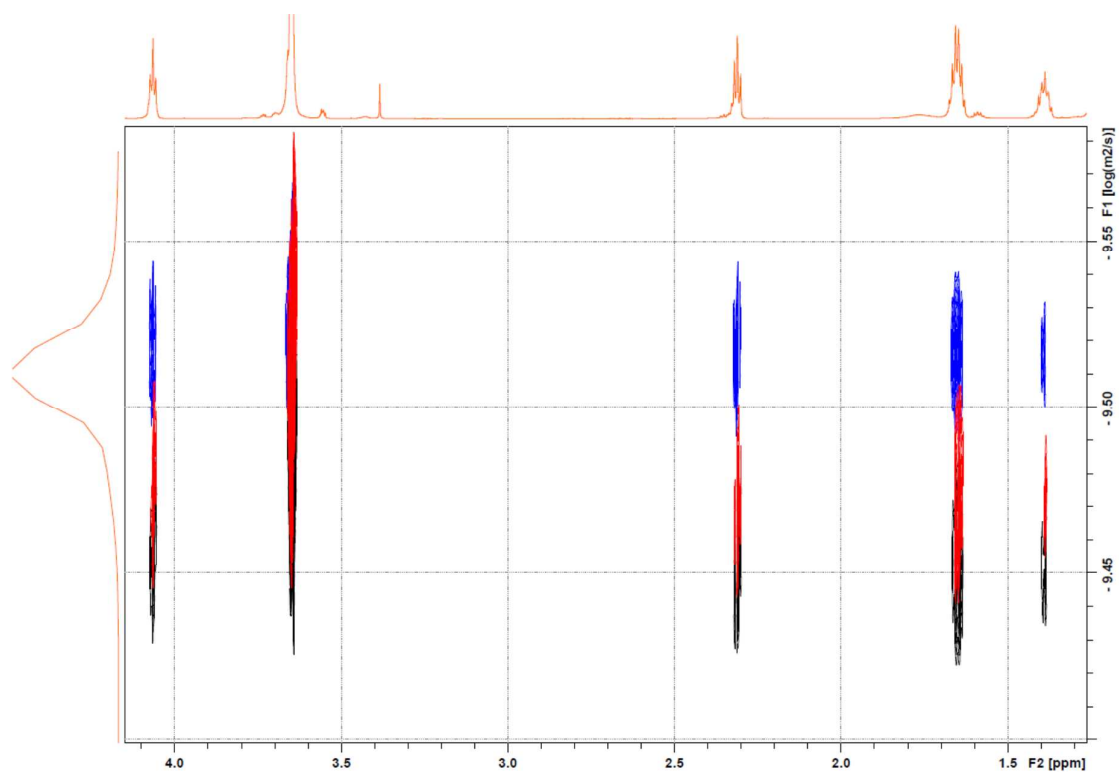

**Figure S5.** Comparison of three  $^1\text{H}$ -DOSY NMR spectra of Figure S3. The spectra clearly indicates a slow diffusion coefficient for P2 (blue;  $D = 2.961 \times 10^{-10} \text{ m}^2/\text{s}$ ) under dark condition, than for the P2 irradiated with light of  $50 \text{ mW}/\text{cm}^2$  (red;  $D = 3.283 \times 10^{-10} \text{ m}^2/\text{s}$ ) and  $100 \text{ mW}/\text{cm}^2$  (black;  $D = 3.407 \times 10^{-10} \text{ m}^2/\text{s}$ ).

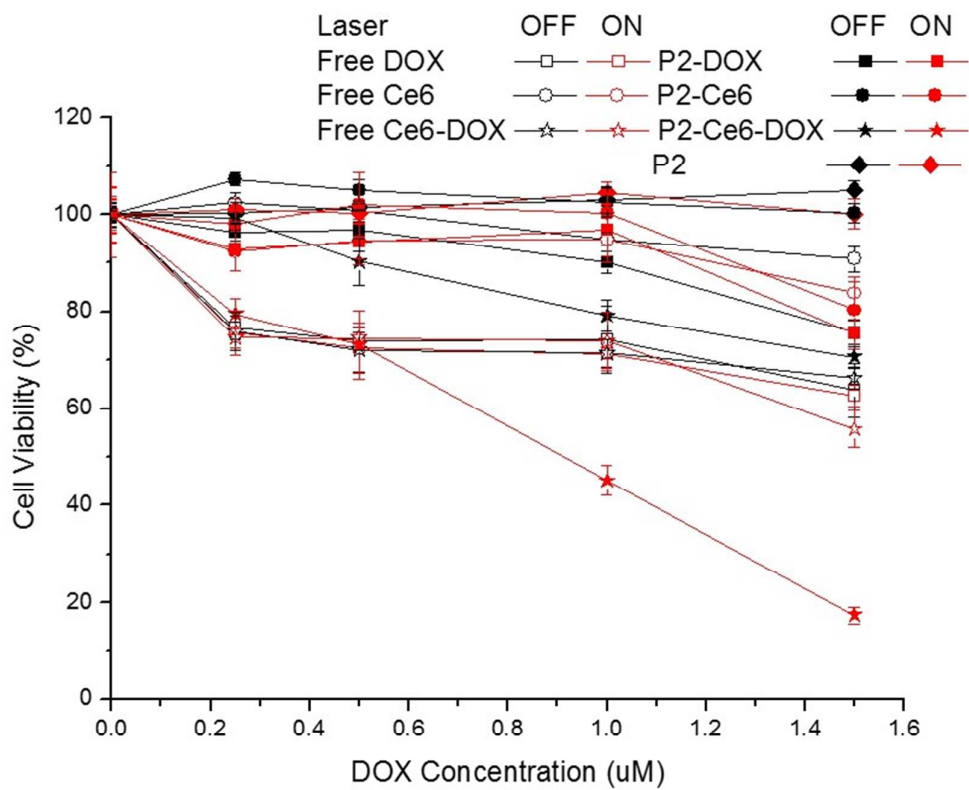

**Figure S6.** *In vitro* cytotoxicity evaluation of samples with different concentration scale of DOX on MDA-MB-231 cell lines.
